# Supplementary material for: Actionable loss of SLF2 drives B‐cell lymphomagenesis and impairs the DNA damage response
Source: PubMed Central journal article supplement (PMC10493575; doi:10.15252/emmm.202216431), 2023-07-24

Figure 4A

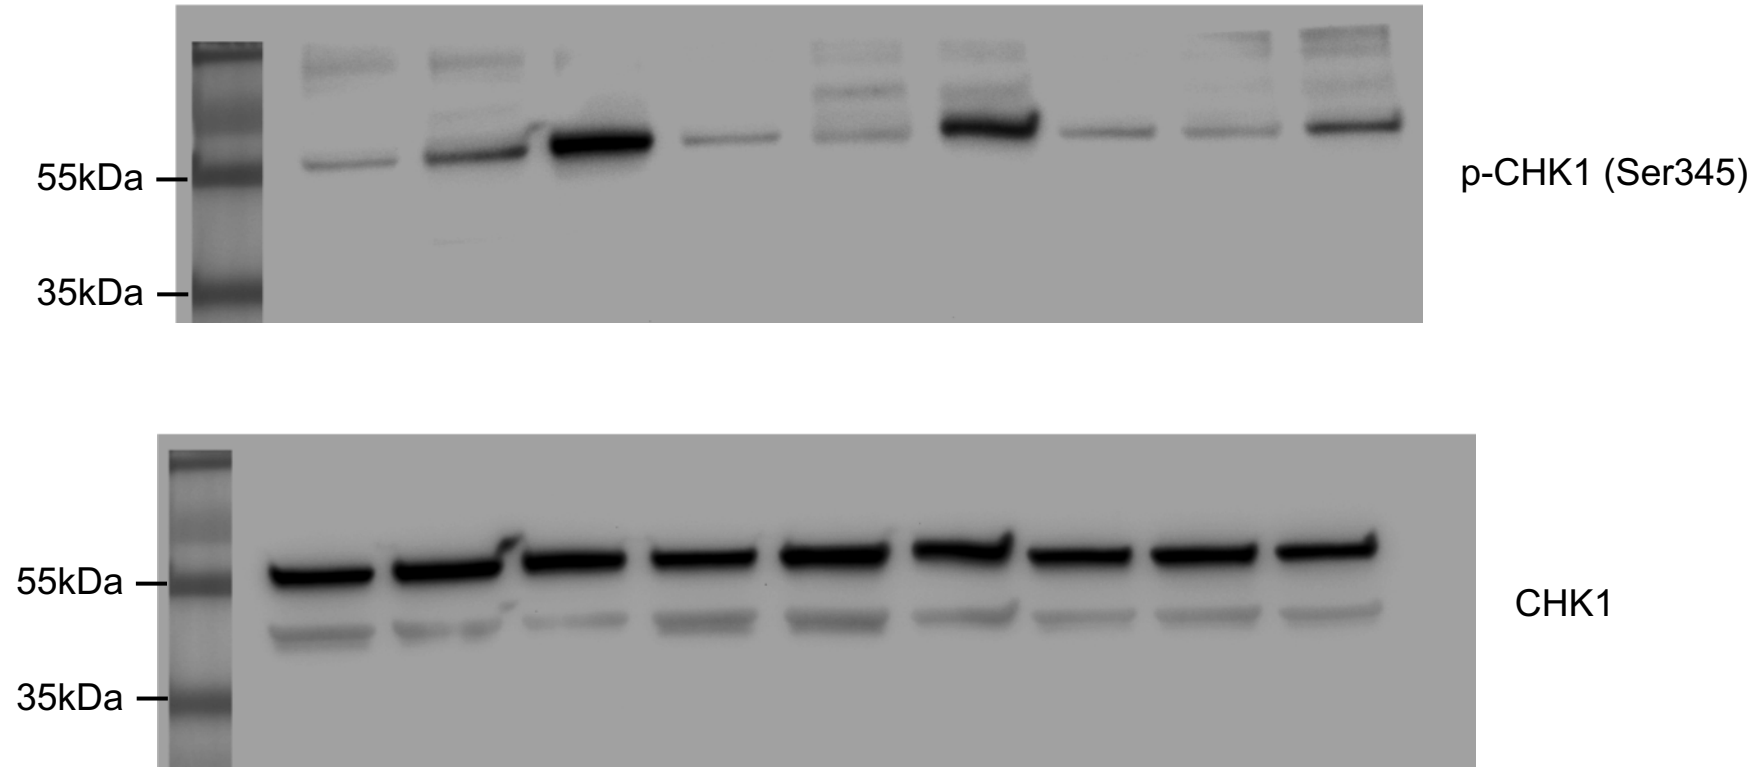

Figure 4A

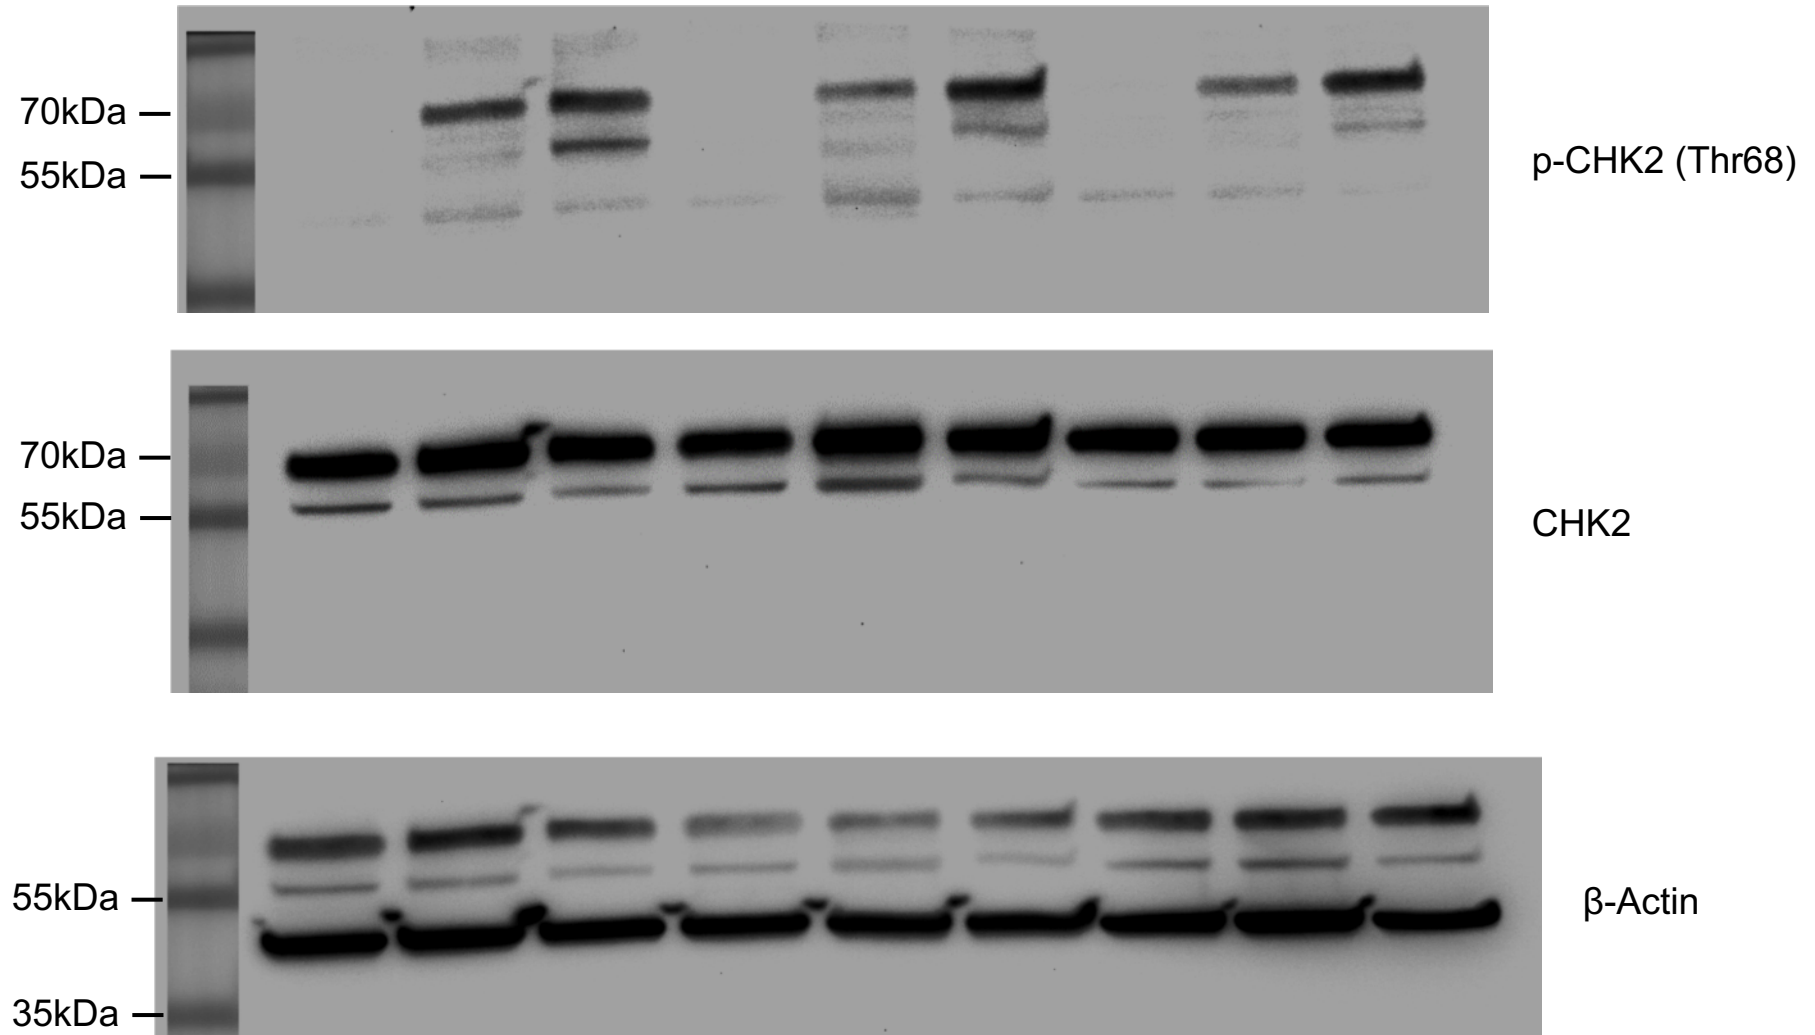

Figure 4B

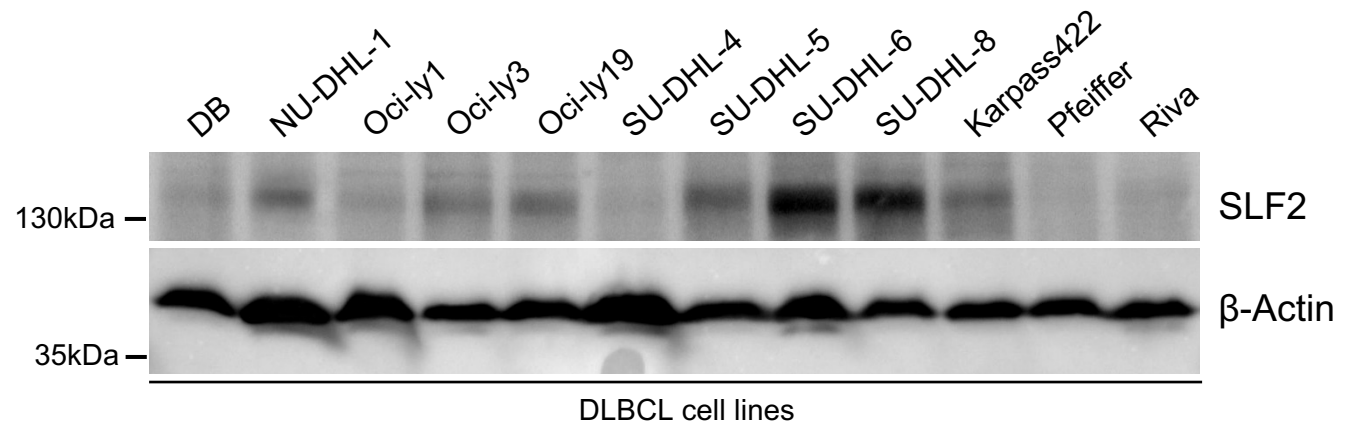

Figure 4B

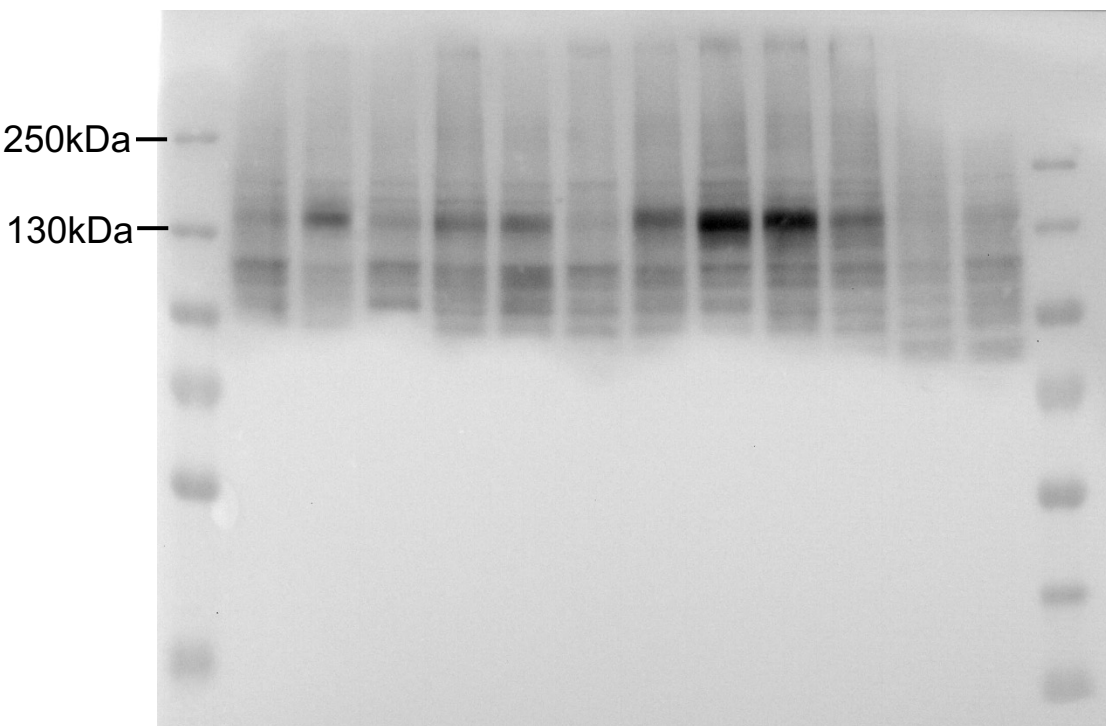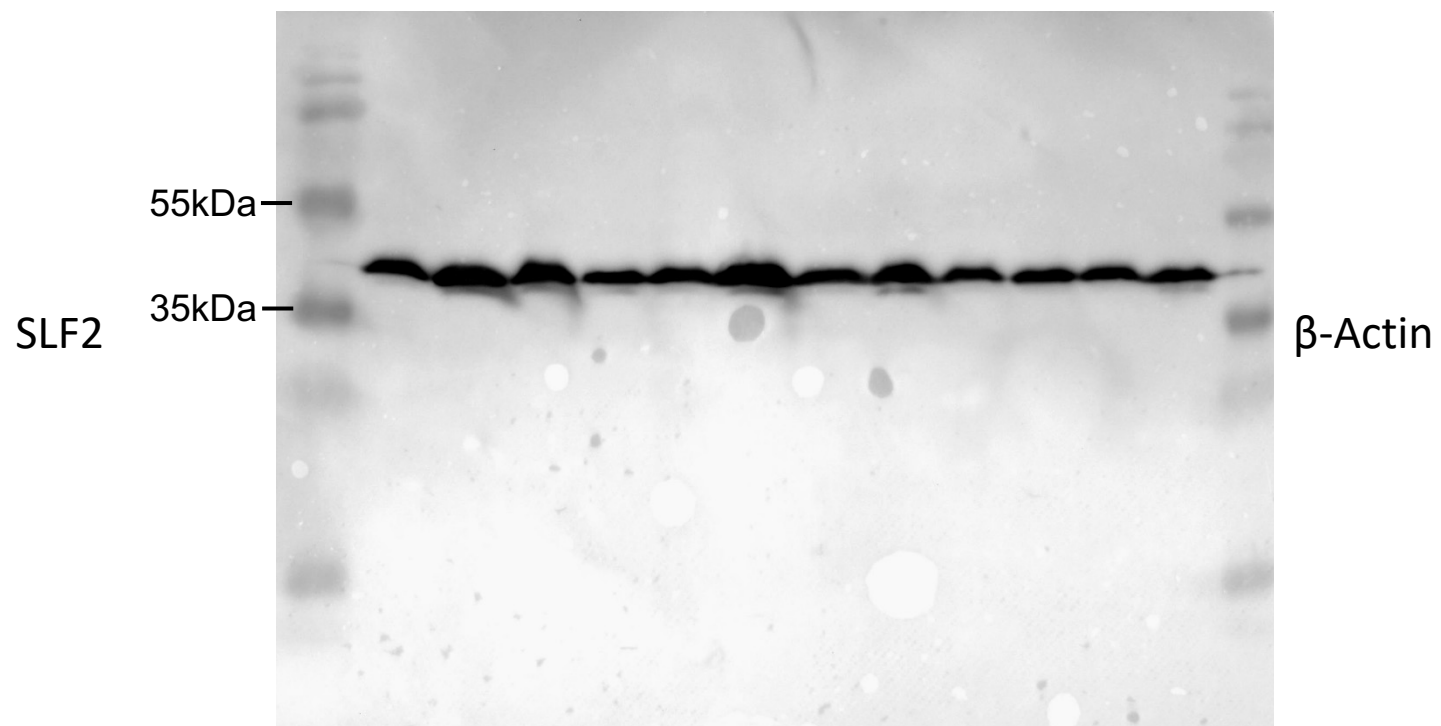

Figure 4C

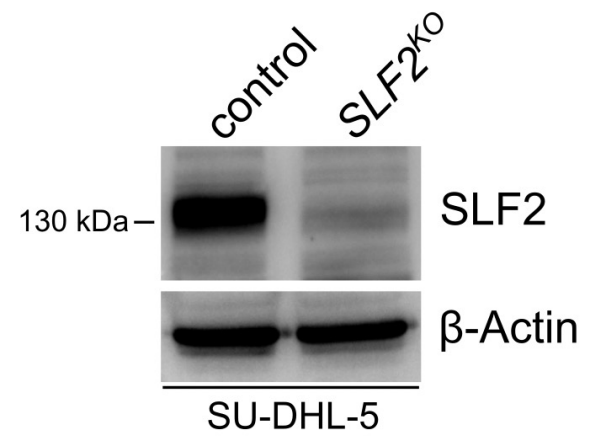

Figure 4C

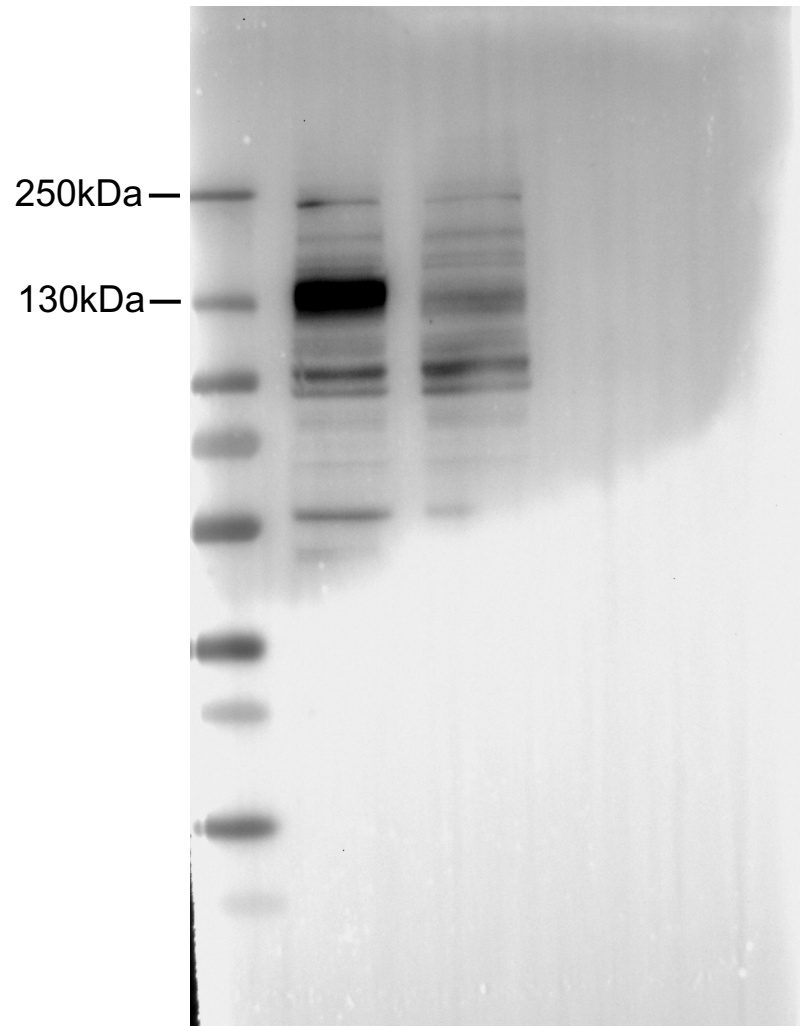

SLF2

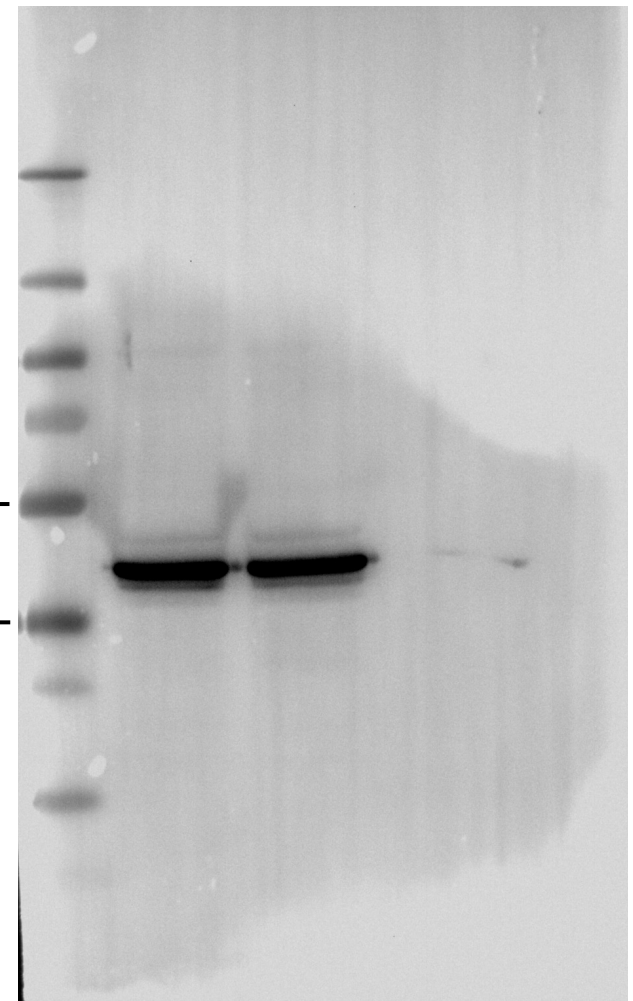

$\beta$ -Actin

Figure 4E

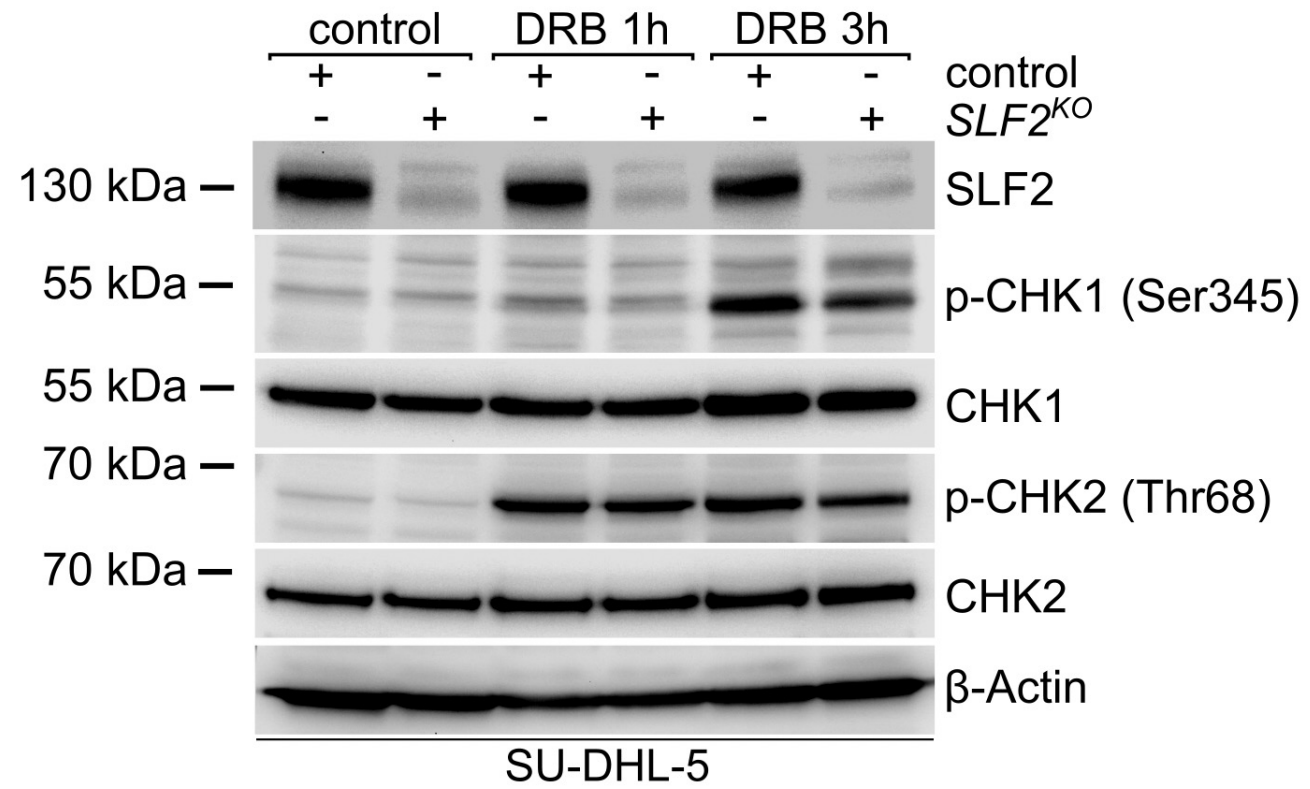



Figure 4E

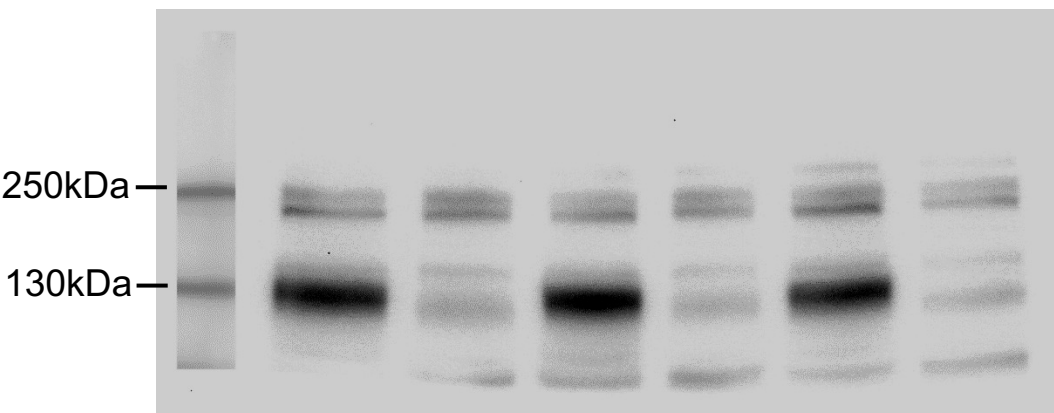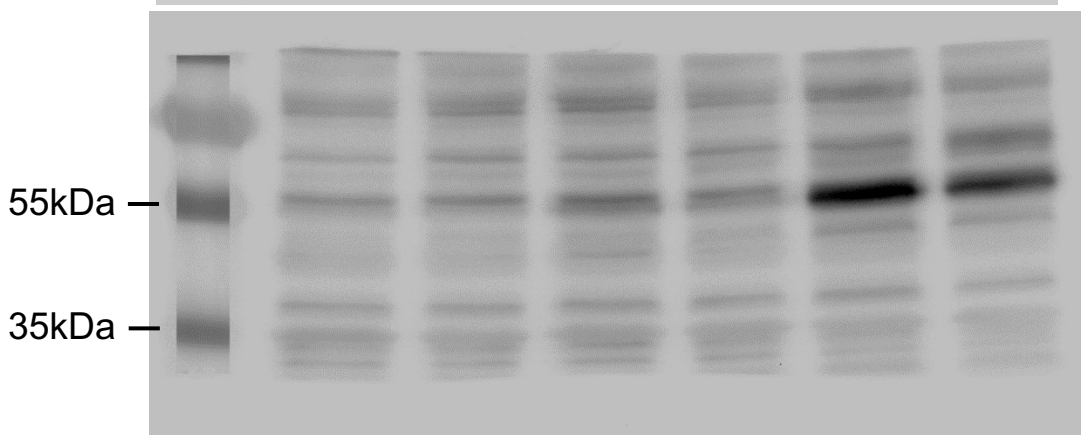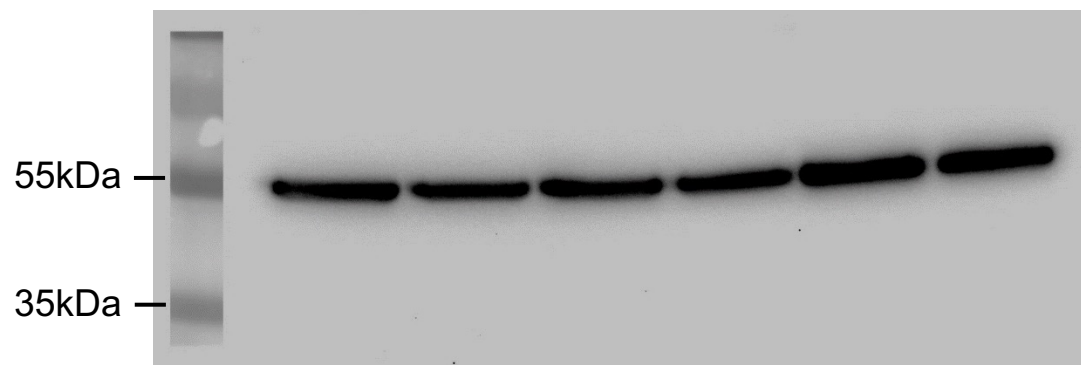

SLF2

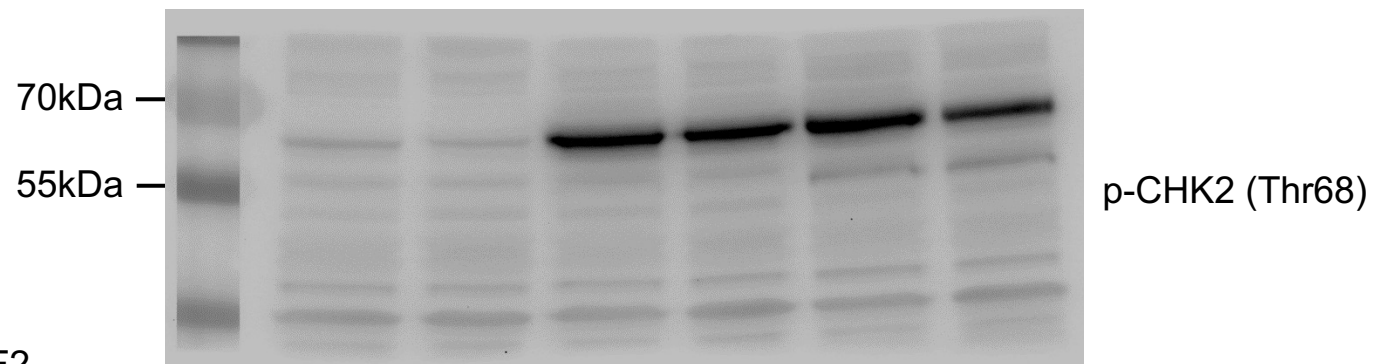

p-CHK1 (Ser345)

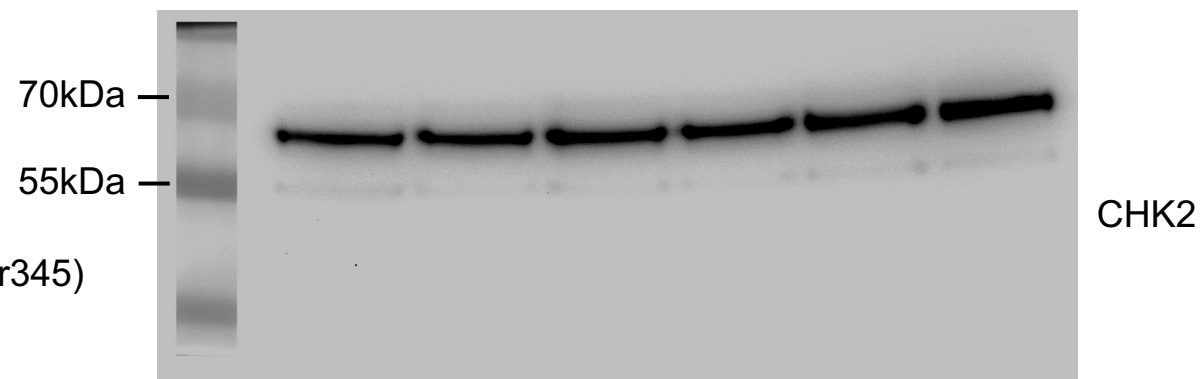

CHK1

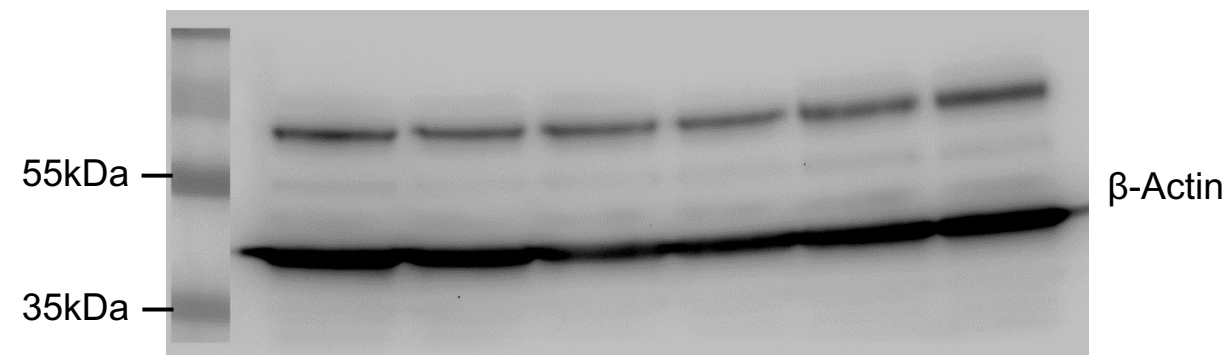

$\beta$ -Actin

Figure 4G

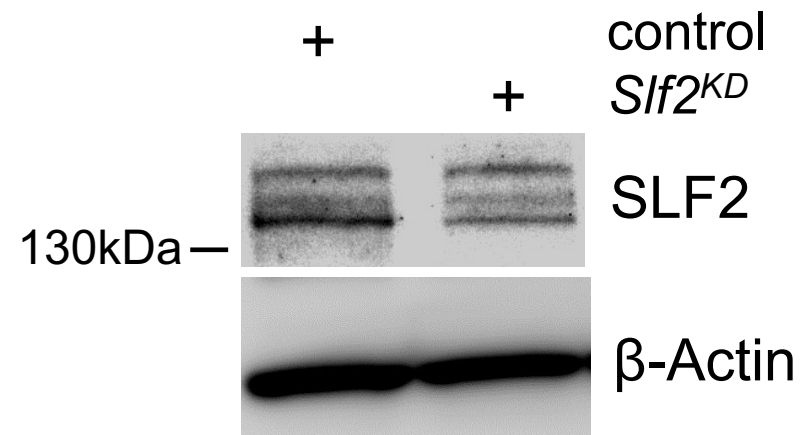

Figure 4G

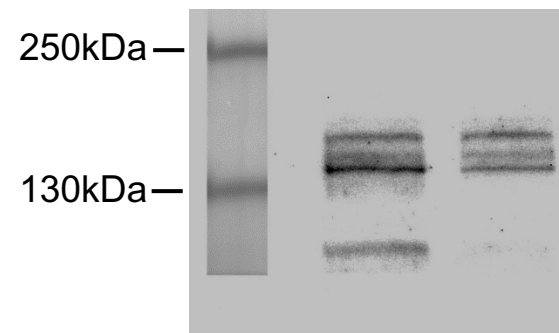

Sif2

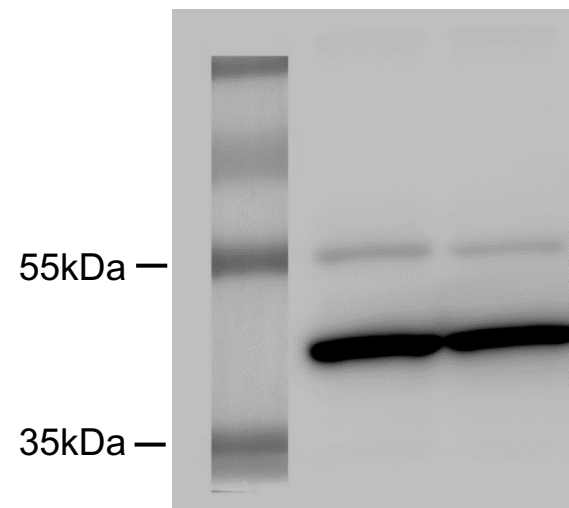

$\beta$ -Actin

Figure 4I

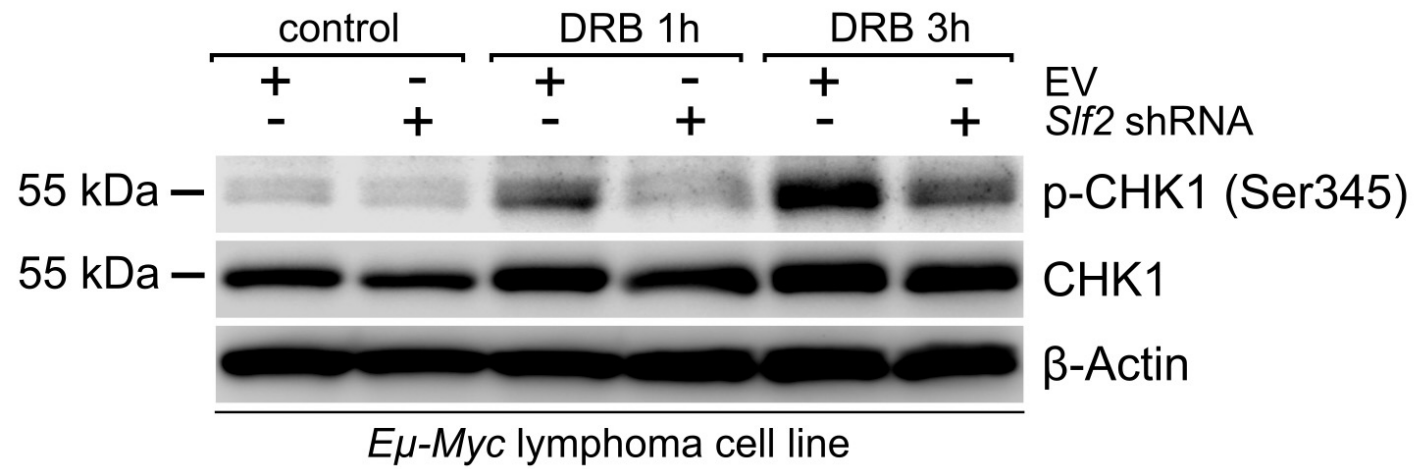

Figure 4I

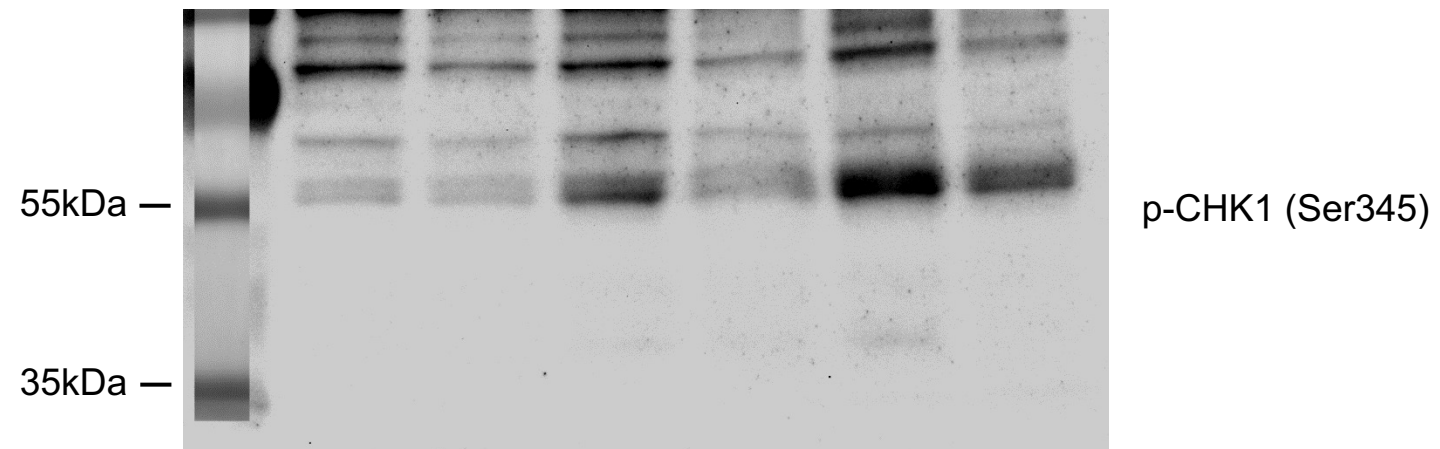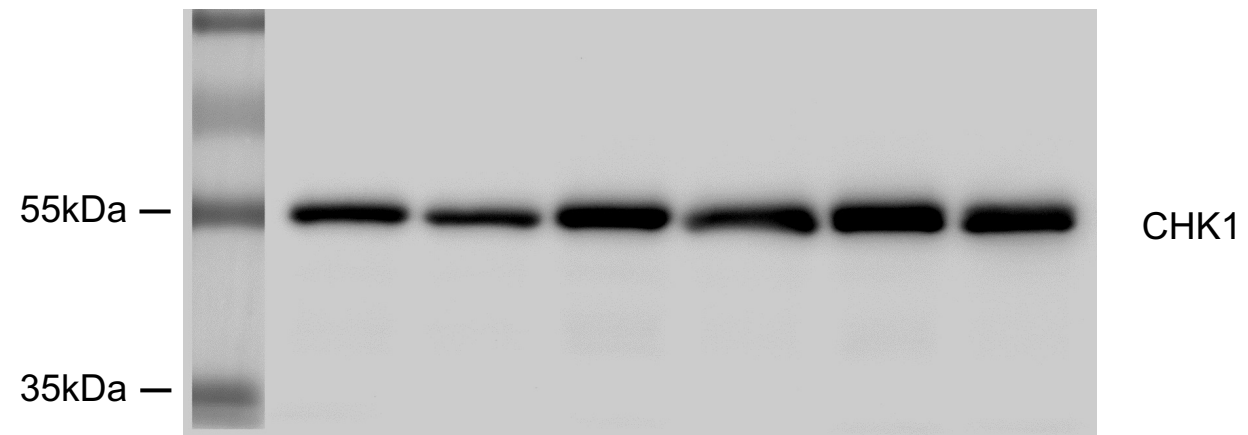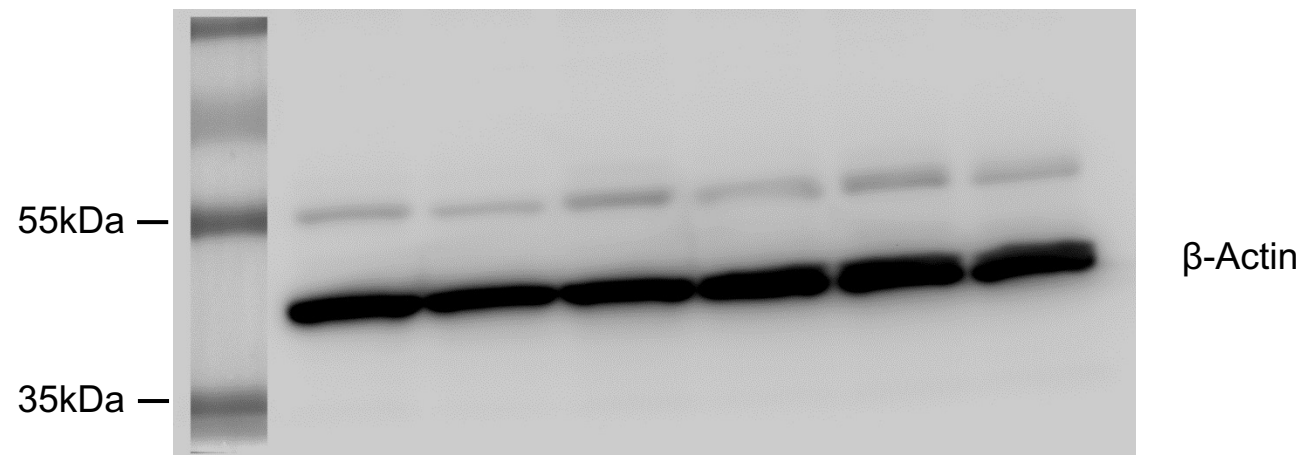

Supplement: EMMM-15-e16431-s007.pdf [file EMMM-15-e16431-s007.pdf]
