# Supplementary material for: Actionable loss of SLF2 drives B‐cell lymphomagenesis and impairs the DNA damage response
Source: PubMed Central journal article supplement (PMC10493575; doi:10.15252/emmm.202216431), 2023-07-24
Supplement: EMMM-15-e16431-s001.pdf [file EMMM-15-e16431-s001.pdf]

Figure 6C

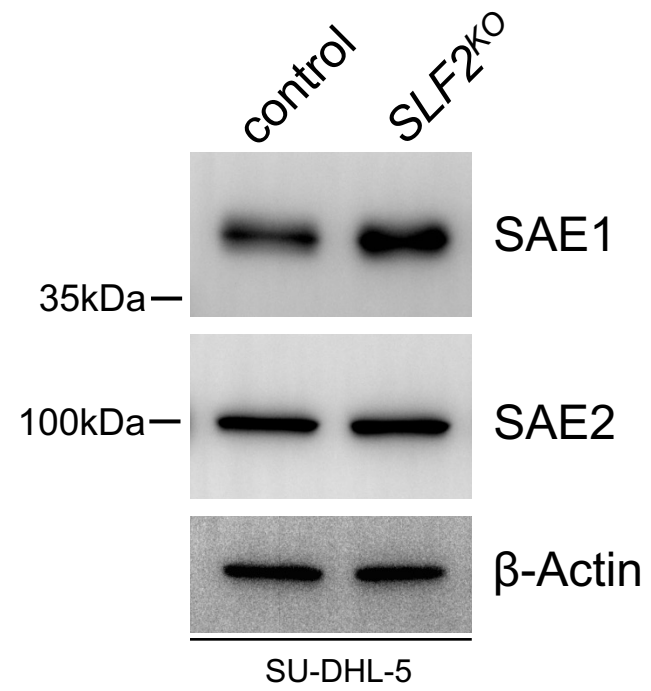

Figure 6C

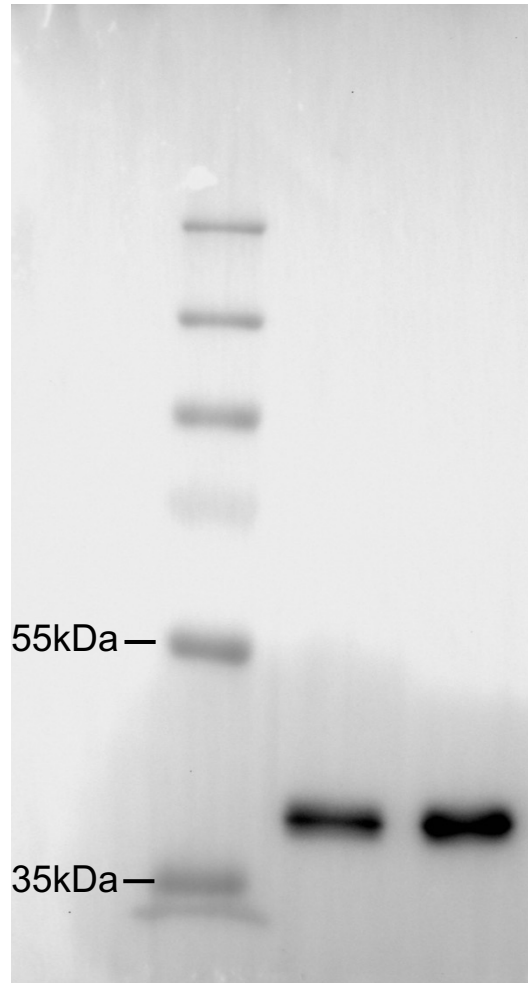

SAE1

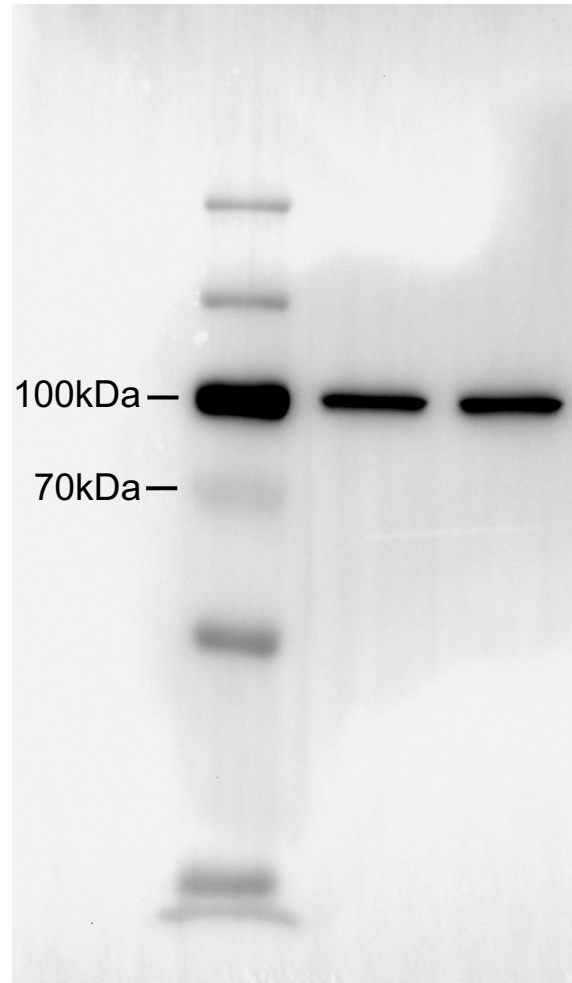

SAE2

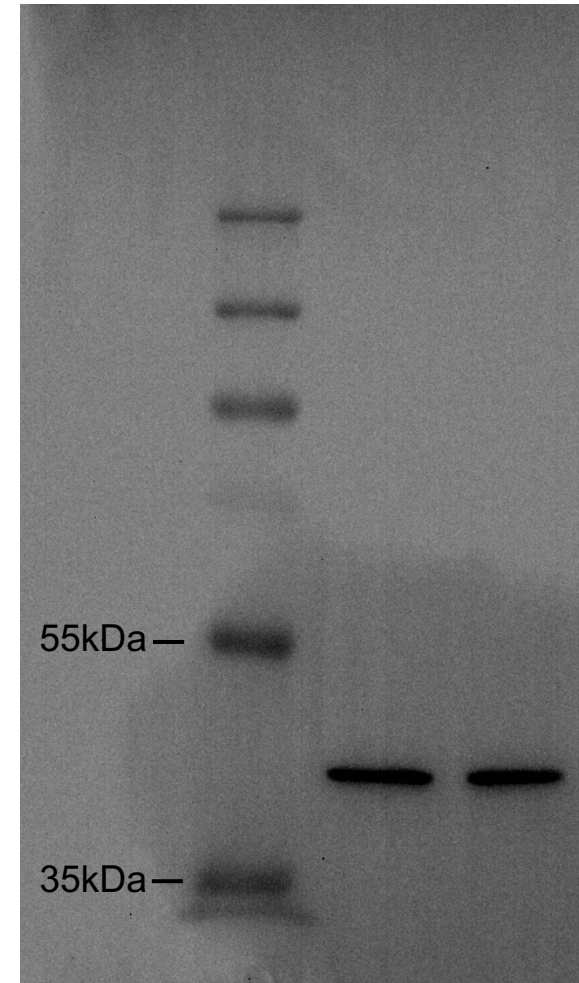

$\beta$ -Actin
