# Supplementary material for: Actionable loss of SLF2 drives B‐cell lymphomagenesis and impairs the DNA damage response
Source: PubMed Central journal article supplement (PMC10493575; doi:10.15252/emmm.202216431), 2023-07-24

Figure 7A

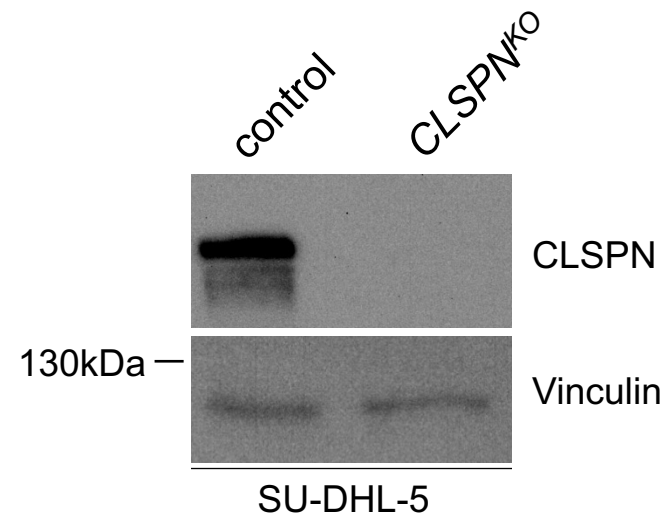

Figure 7A

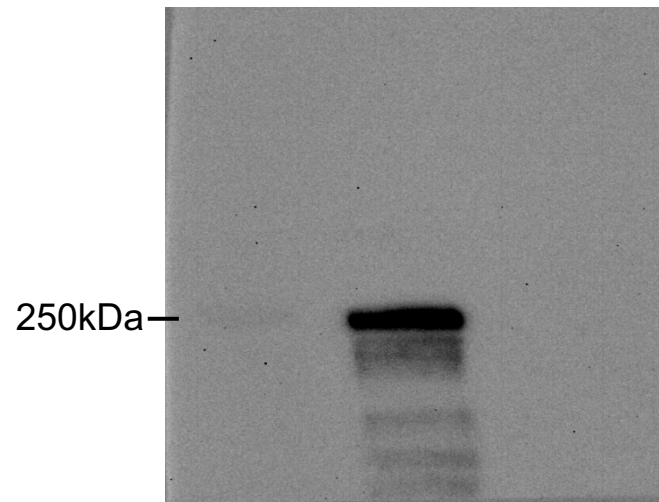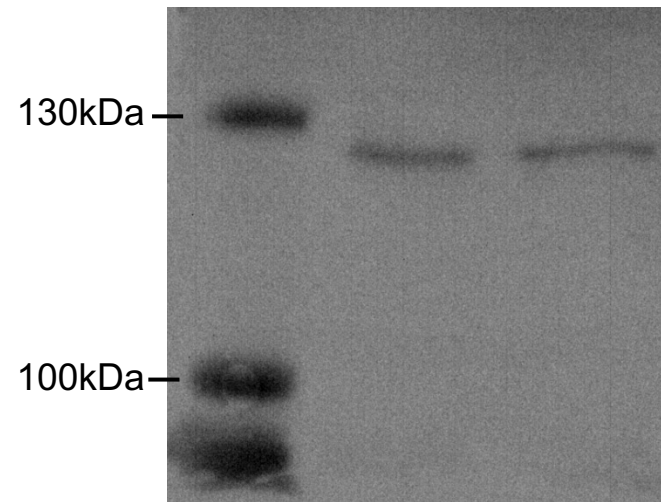

Figure 7B

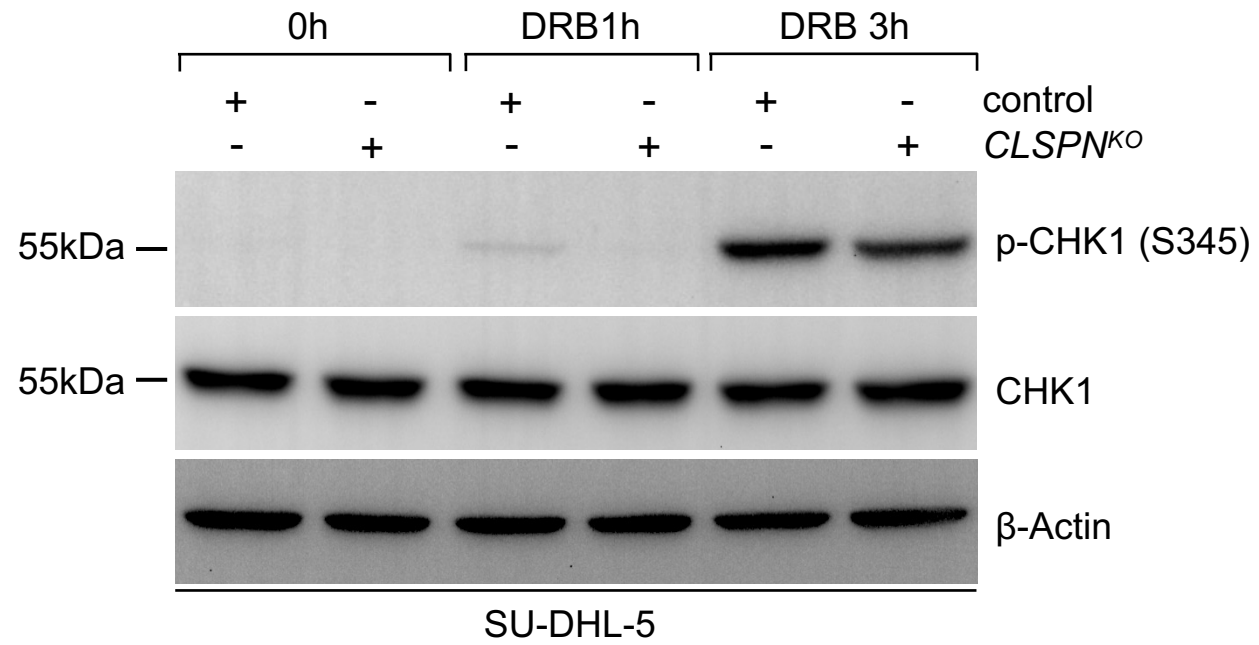

Figure 7B

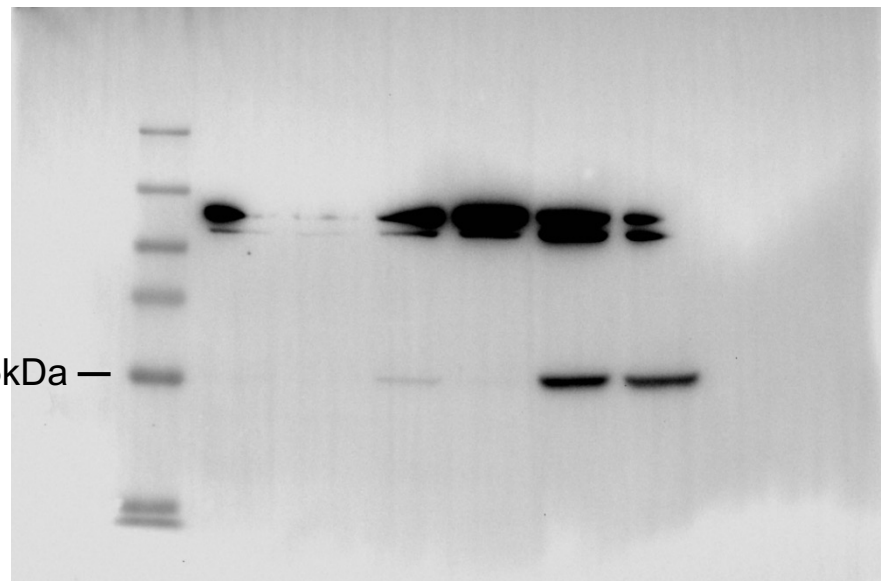

p-Chk1 (S345)

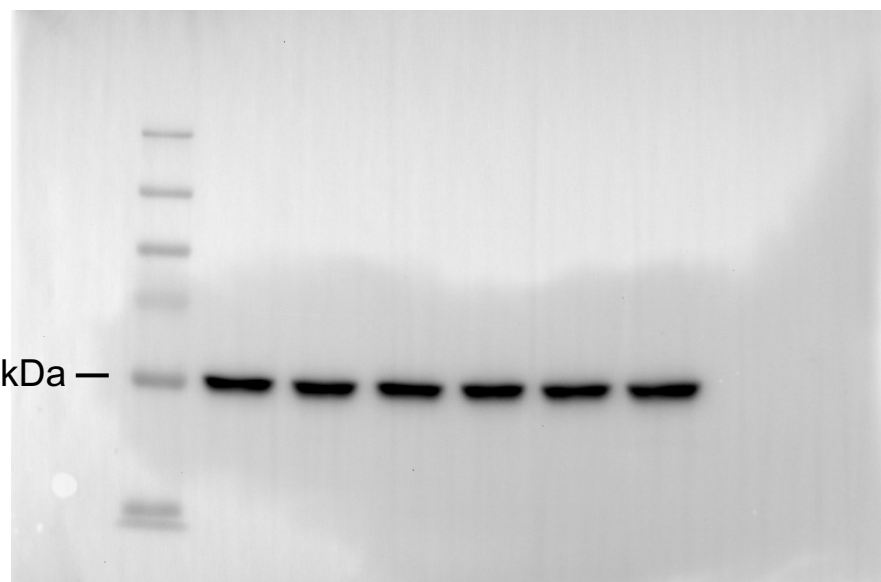

CHK1

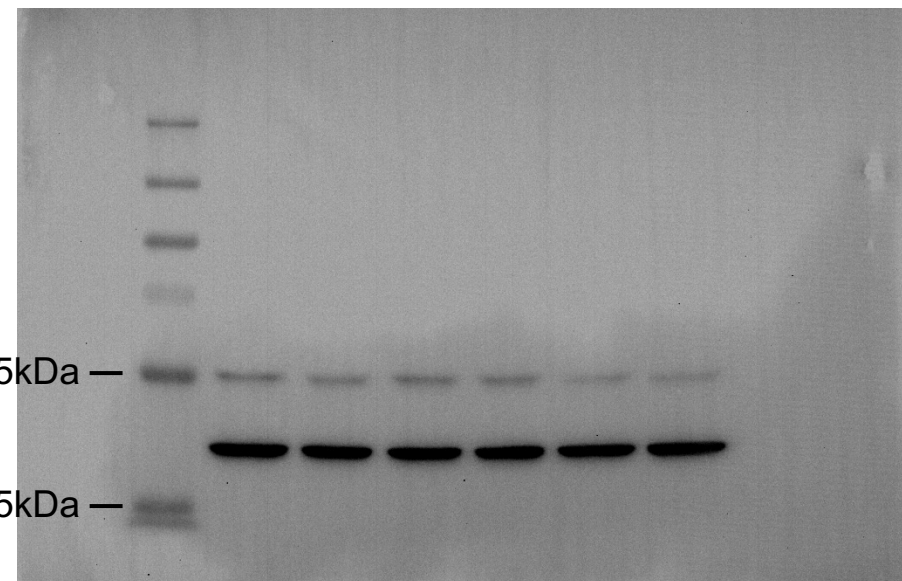

$\beta$ -Actin

Figure 7D

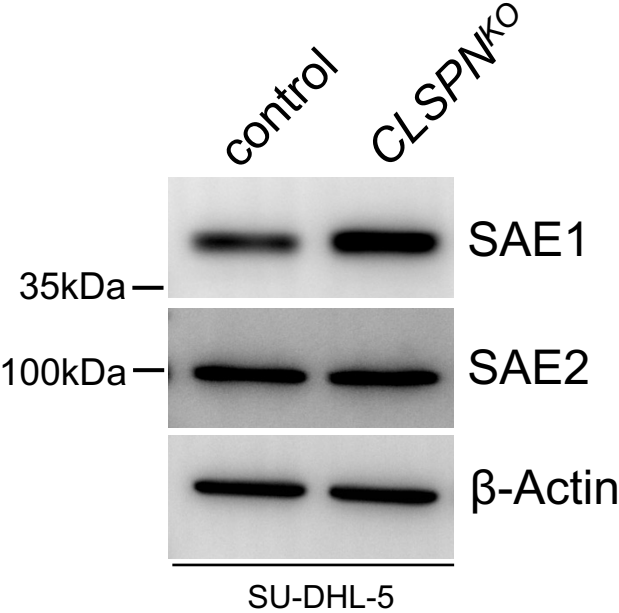

Figure 7D

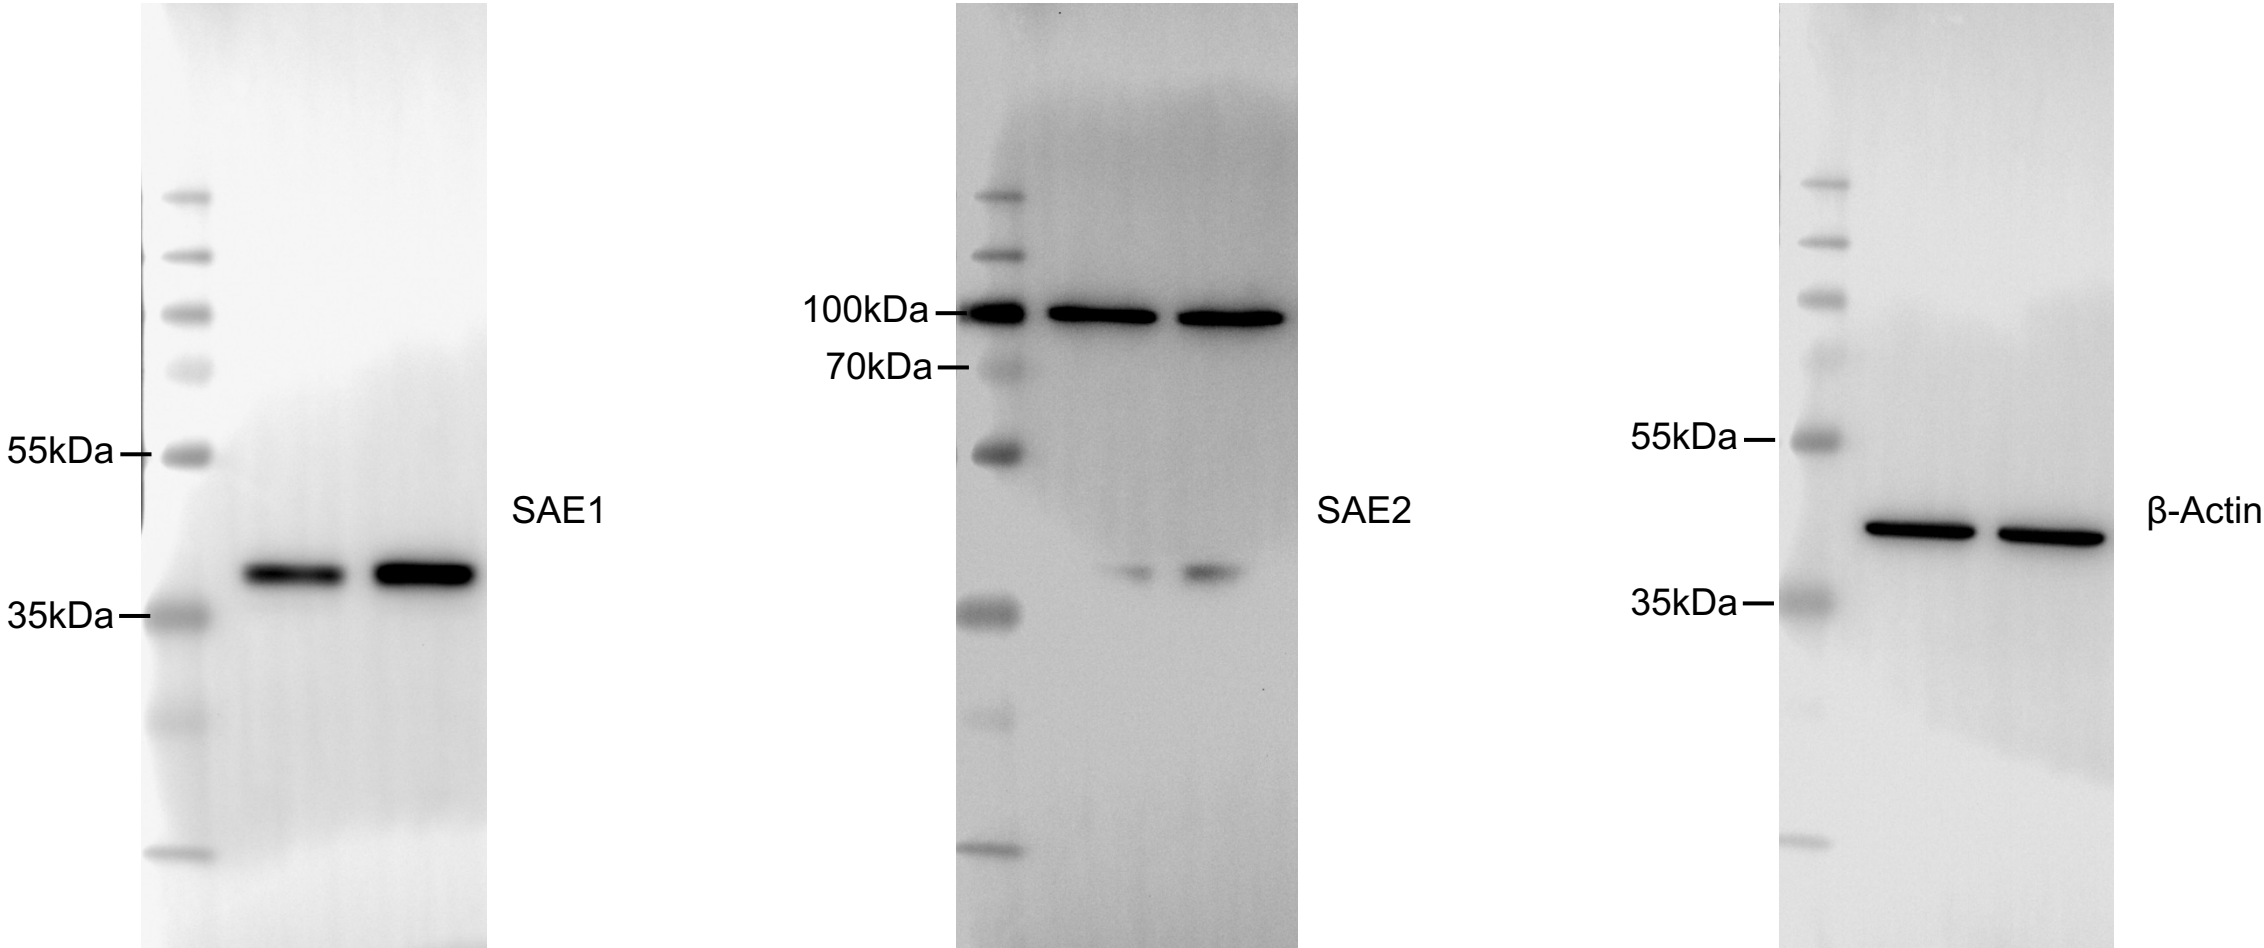

Supplement: EMMM-15-e16431-s006.pdf [file EMMM-15-e16431-s006.pdf]
