# Supplementary material for: Actionable loss of SLF2 drives B‐cell lymphomagenesis and impairs the DNA damage response
Source: PubMed Central journal article supplement (PMC10493575; doi:10.15252/emmm.202216431), 2023-07-24

Main Figure 5B and Appendix Figure S12I

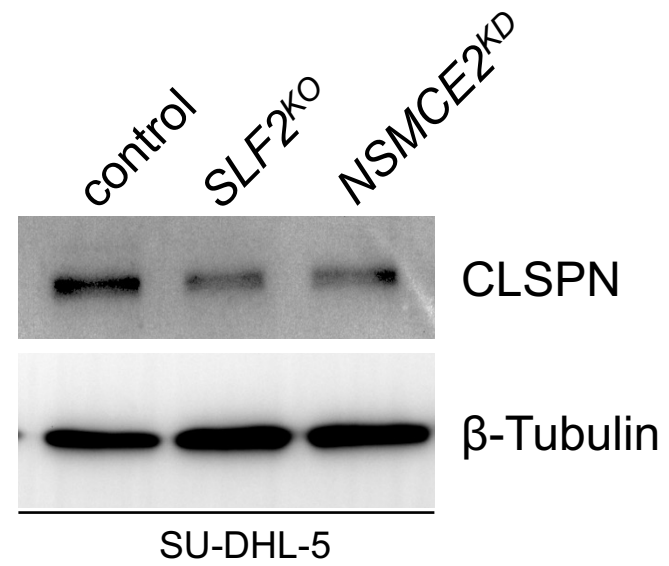

Main Figure 5B and Appendix Figure S12I

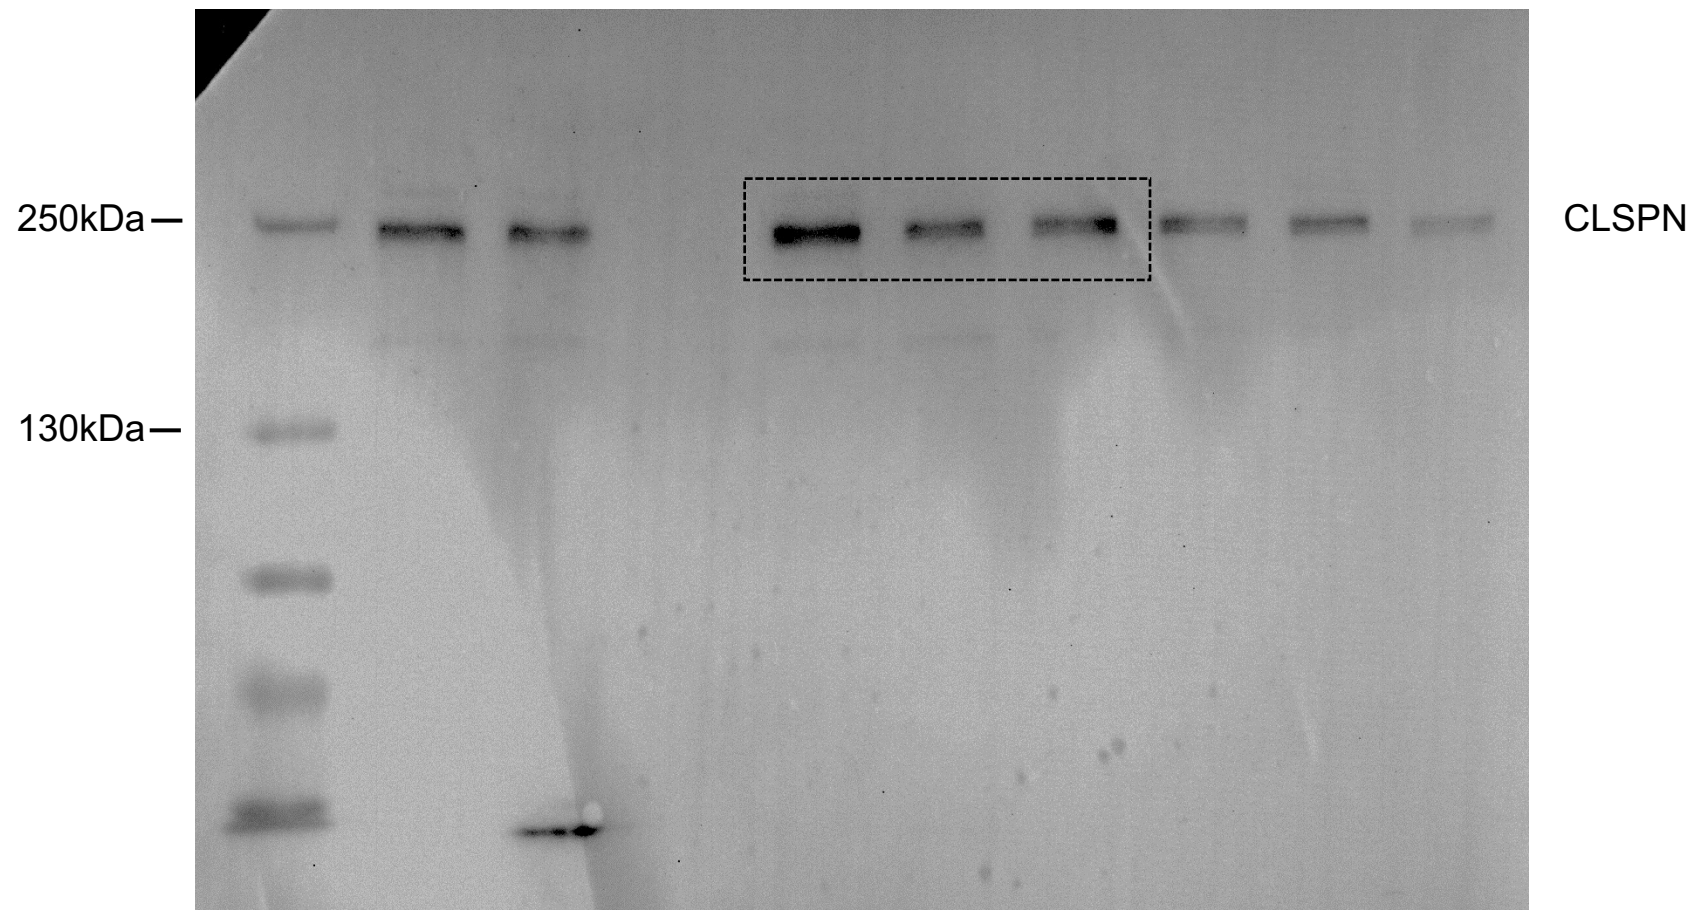

Main Figure 5B and Appendix Figure S12I

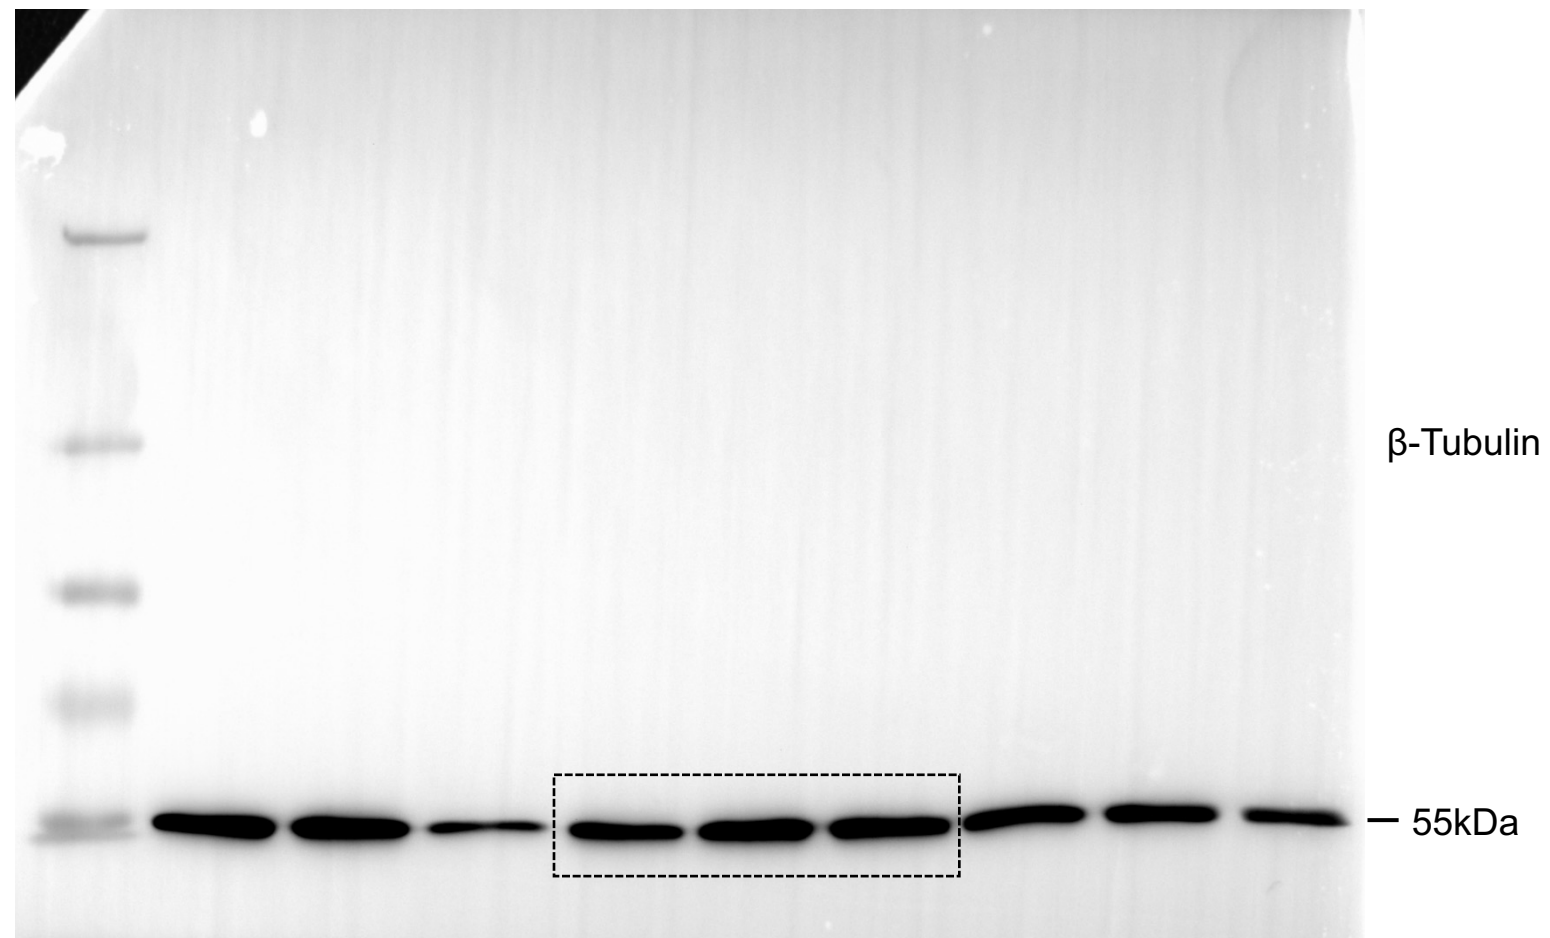

Figure 5E

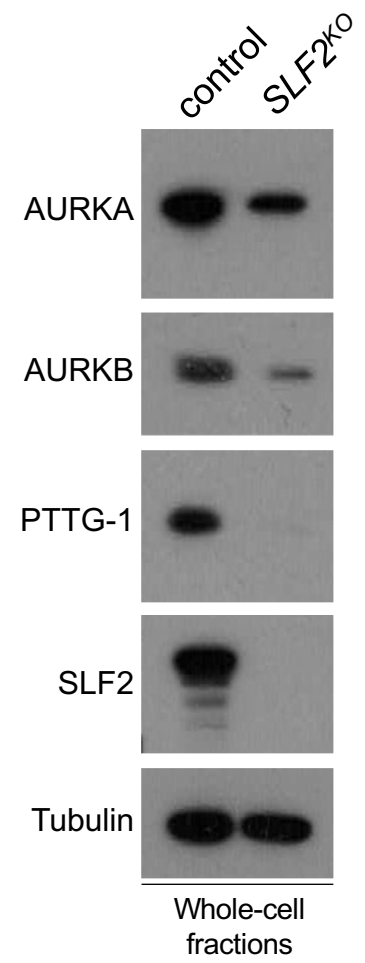

Figure 5E

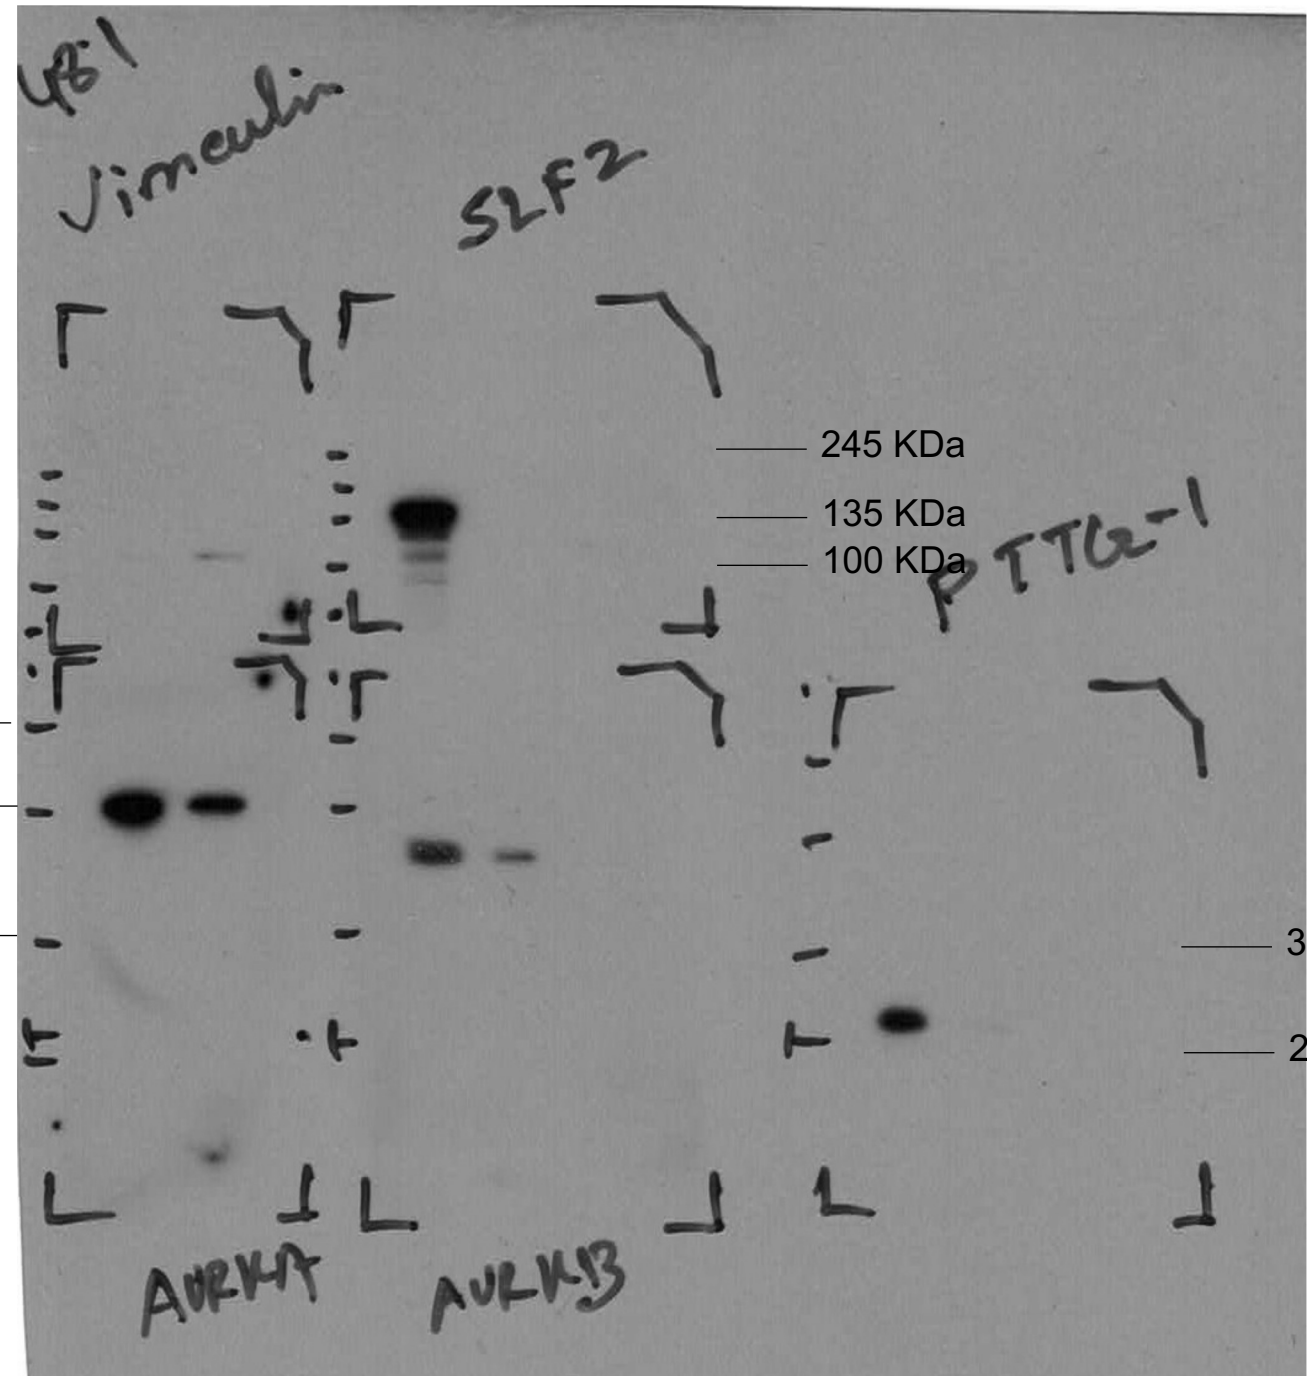

Tubulin

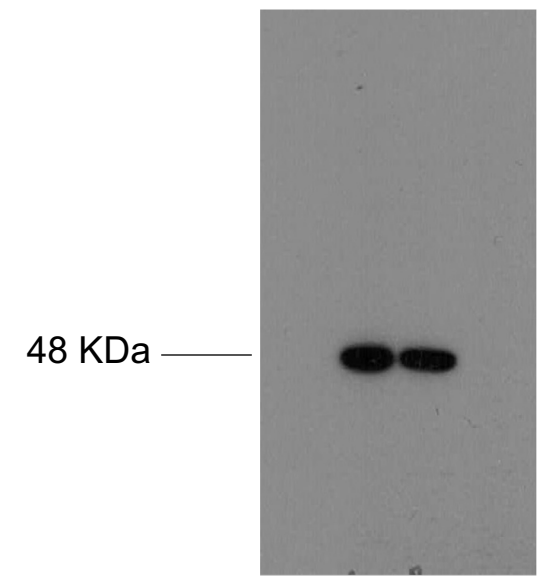

Figure 5F

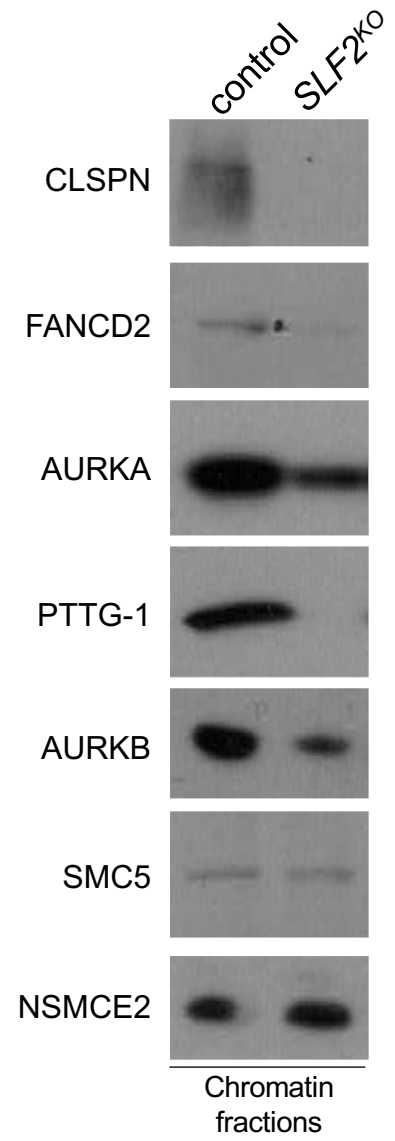

Figure 5F

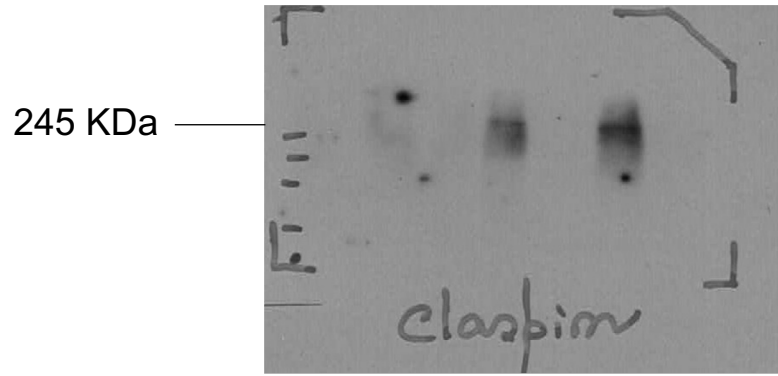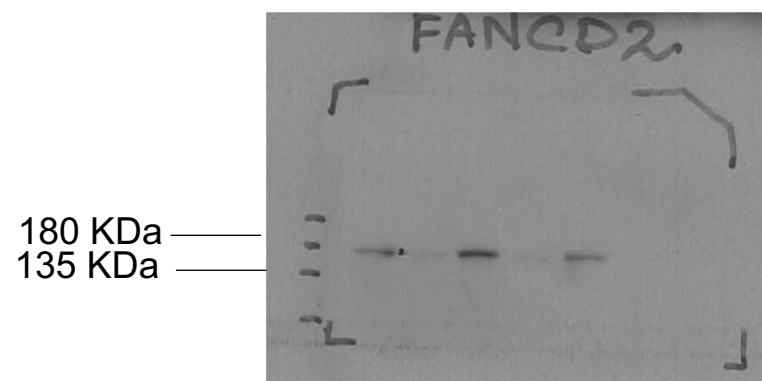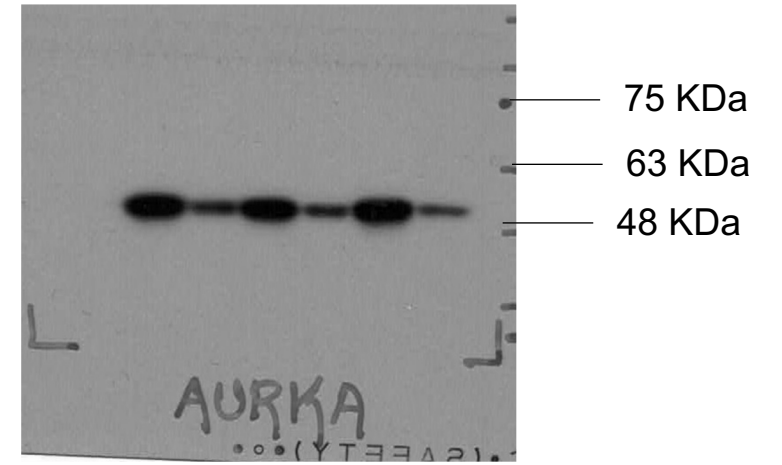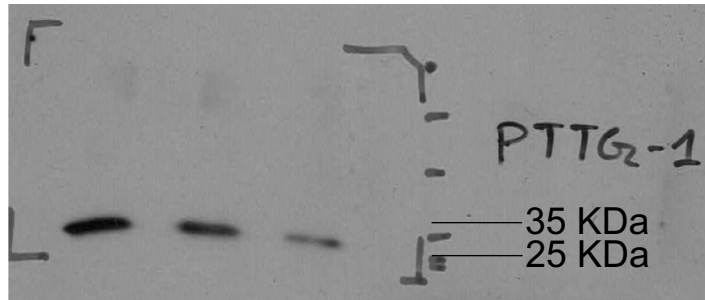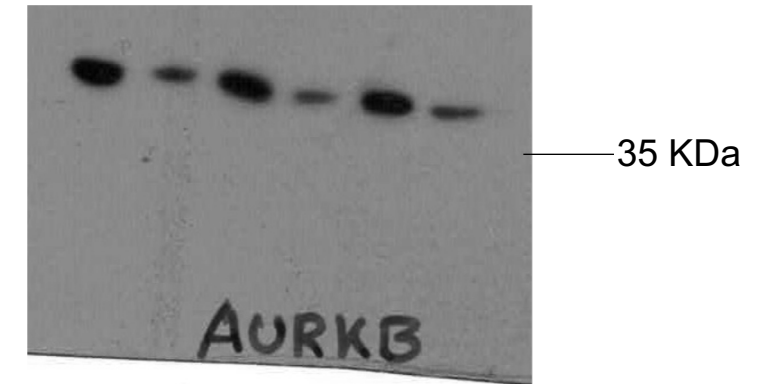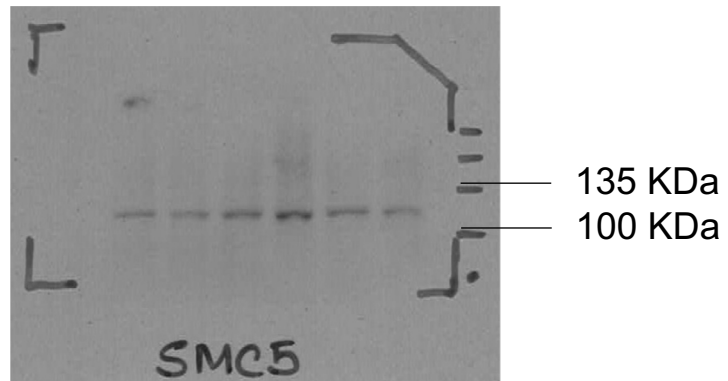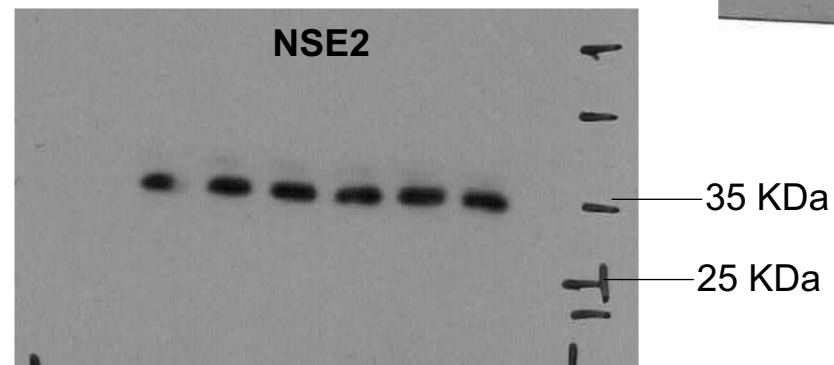

Supplement: EMMM-15-e16431-s010.pdf [file EMMM-15-e16431-s010.pdf]
